# Supplementary material for: CN-substituted ortho-terphenyl core based high triplet energy bipolar host materials for stable and efficient blue TADF devices
Source: Royal Society of Chemistry journal article supplement (doi:10.1039/d1tc01119g), 2021-01-01
Supplement: d1tc01119g1.pdf [file d1tc01119g1.pdf]

## **CN-Substituted *Ortho*-terphenyl Core Based High Triplet Energy Bipolar Host Materials for Stable and Efficient Blue TADF Device**

Hyuna Lee<sup>a1</sup>, Jun Hyuk Park<sup>b1</sup>, Ki Joon Yang<sup>a</sup>, Soon Jae Hwang<sup>a</sup>, Ramanaskanda Braveenth<sup>a</sup>  
Tae Hoon Ha<sup>b</sup>, Min I Han<sup>b</sup>, Chil Won Lee<sup>\*b</sup> and Jang Hyuk Kwon<sup>\*a</sup>

a Organic Optoelectronic Device Lab. (OODL), Department of Information Display, Kyung Hee University, 26, Kyungheedaero, Dongdaemun-gu, Seoul, 02447, Republic of Korea

b Department of Chemistry, College of Science and Technology, Dankook University, Cheonan, 31116, Republic of Korea

E-mail: chili@dankook.ac.kr, jhkwon@khu.ac.kr

## Supplementary information

### Table of Contents

#### 1. Experimental Details

|                              |   |
|------------------------------|---|
| 1.1 General information..... | 3 |
|------------------------------|---|

#### 2. List of figures

|                                                                                                                                                   |   |
|---------------------------------------------------------------------------------------------------------------------------------------------------|---|
| Figure S1: <sup>1</sup> H NMR of <i>o</i> CN-OTP.....                                                                                             | 3 |
| Figure S2: <sup>13</sup> C NMR of <i>o</i> CN-OTP.....                                                                                            | 4 |
| Figure S3: HRMS of <i>o</i> CN-OTP .....                                                                                                          | 4 |
| Figure S4: <sup>1</sup> H NMR of <i>m</i> CN-OTP.....                                                                                             | 5 |
| Figure S5: <sup>13</sup> C NMR of <i>m</i> CN-OTP.....                                                                                            | 5 |
| Figure S6: HRMS of <i>m</i> CN-OTP.....                                                                                                           | 6 |
| Figure S7: Cyclic Voltammetry (CV) curve of DCz-OTP, <i>o</i> CN-OTP and <i>m</i> CN-OTP.....                                                     | 6 |
| Figure S8: TGA and DSC graphs of DCz-OTP, <i>o</i> CN-OTP and <i>m</i> CN-OTP.....                                                                | 7 |
| Figure S9: Spectral overlap between PL emission of three host and absorption of DBA-DI TADF dopant.....                                           | 7 |
| Figure S10: Comparison of phosphorescence spectra in toluene and film TRPL of 30% of DBA-DI in DCz-OTP, <i>o</i> CN-OTP and <i>m</i> CN-OTP ..... | 8 |
| Figure S11: Device lifetimes of <i>m</i> CN-OTP host device depending on the thickness of ETL...8                                                 |   |
| Figure S12: Calculation of Bond dissociation energies of host materials in neutral, anion, and cationstates.....                                  | 9 |

# 1. Experimental Details

## 1.1 General information

All reagents were purchased from commercial suppliers and used as received. All solvents were used without additional purification. To verify molecular structures of the synthesized materials,  $^1\text{H}$  NMR and  $^{13}\text{C}$  NMR spectrum was measured using Bruker Avance III-400 NMR spectrometer. High-resolution mass spectra were performed using JMS-700 (JEOL, Japan) Gas Chromatography-Mass spectrometer. The transient PL decay was measured using the Quantaurs-Tau fluorescence lifetime measurement system (C11367-03, Hamamatsu Photonics Co.) in a nitrogen-filled atmosphere.

## 2. List of figures

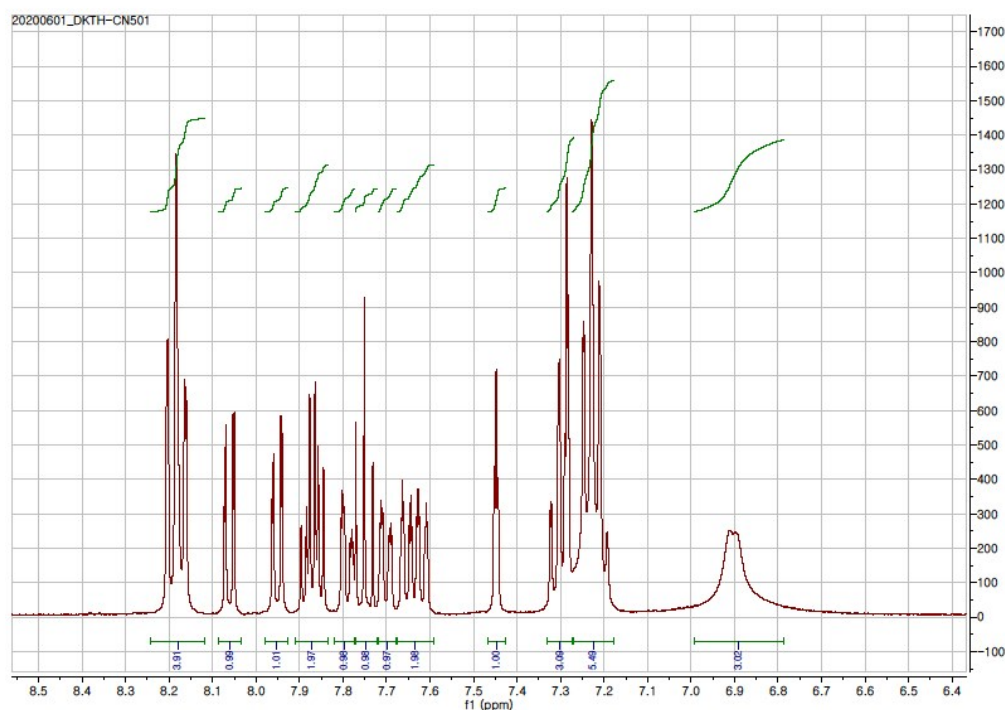

**Figure S1.**  $^1\text{H}$  NMR of *o*CN-OTP.

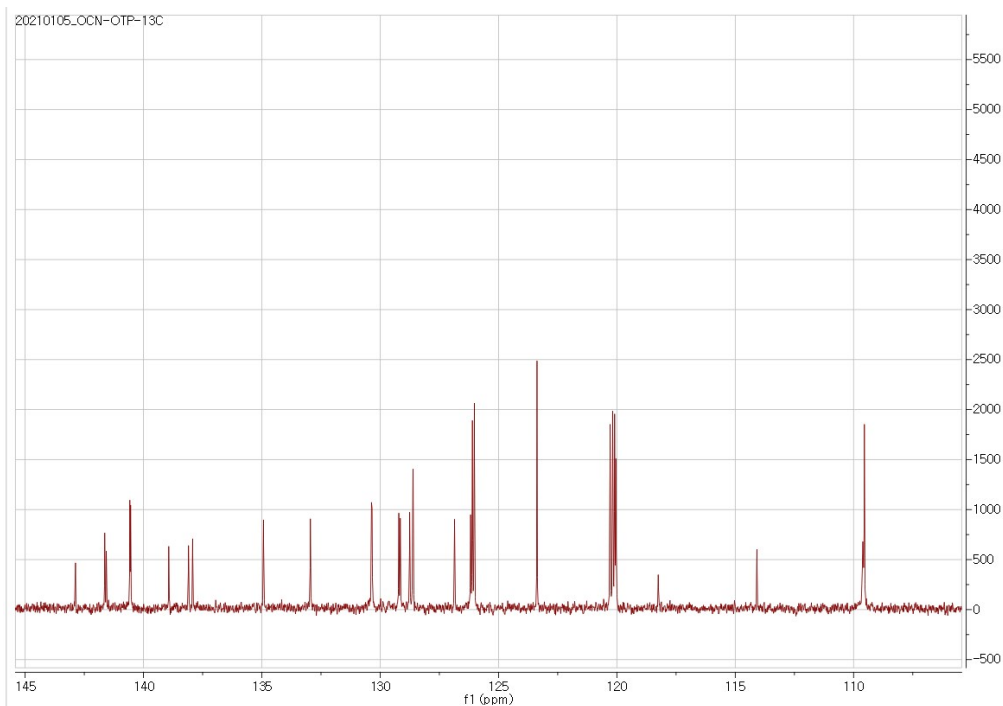

**Figure S2.**  $^{13}\text{C}$  NMR of *o*CN-OTP.

[ Mass Spectrum ]  
 Data : EI-A437 Date : 21-Jan-2021 11:51  
 RT : 0.45 min Scan# : (14.43)  
 Elements : C 100/0, H 100/0, N 10/0  
 Mass Tolerance : 20ppm, 5mmu if  $m/z < 250$ , 20mmu if  $m/z > 1000$   
 Unsaturation (U.S.) : -0.5 - 50.0

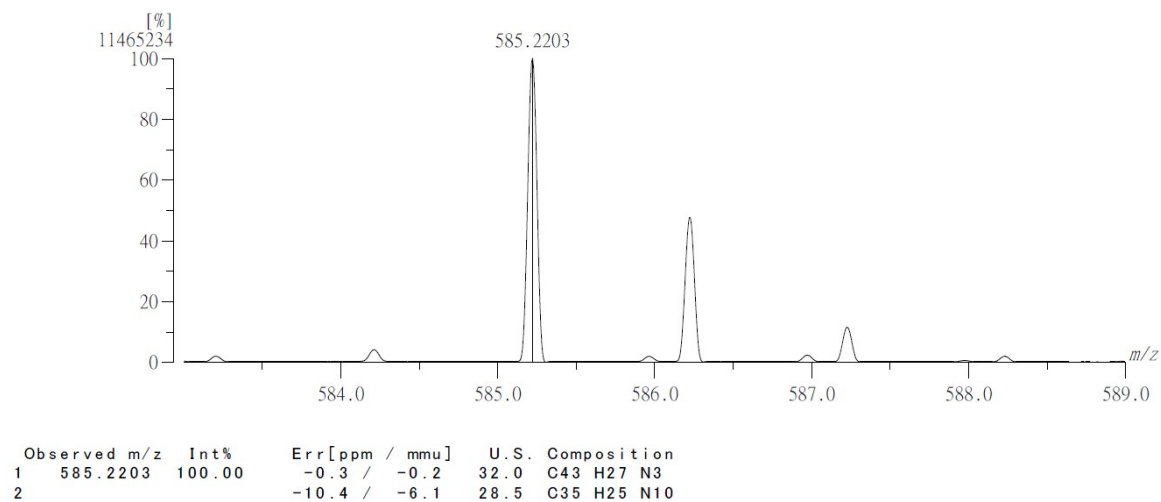

**Figure S3.** HRMS of *o*CN-OTP.

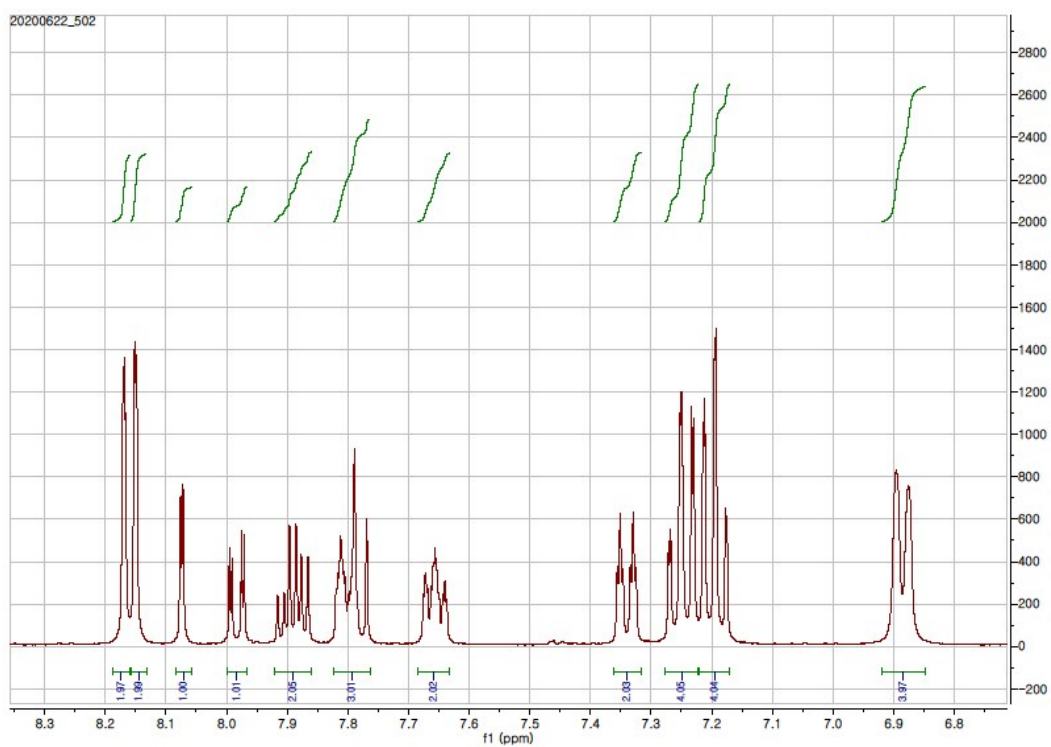

**Figure S4.**  $^1\text{H}$  NMR of *m*CN-OTP.

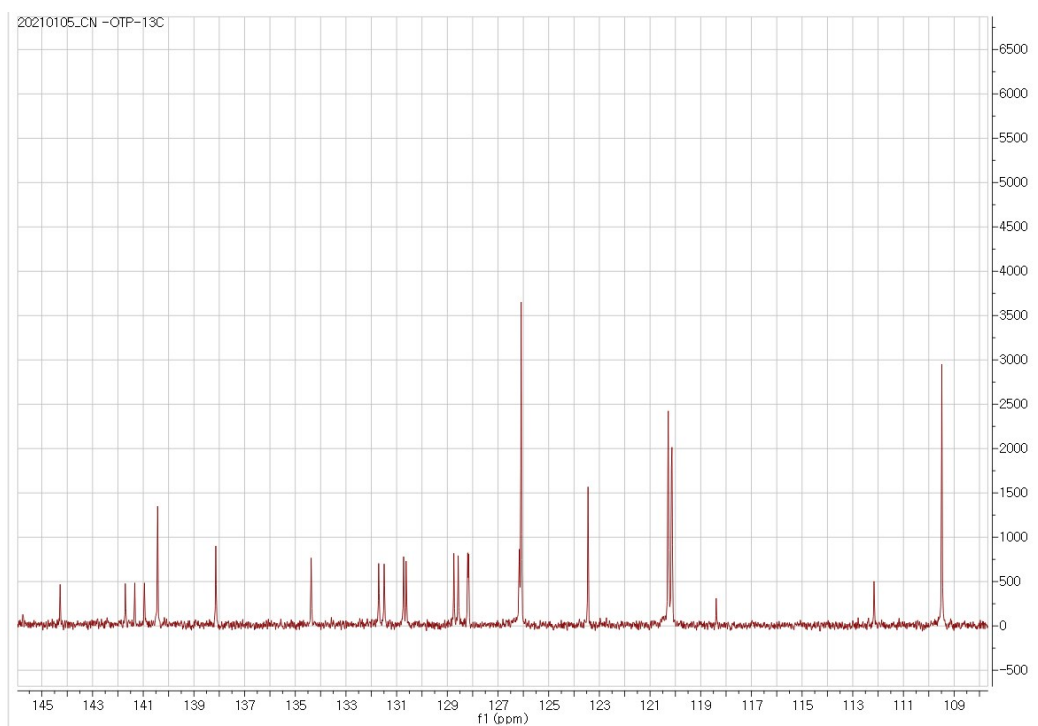

**Figure S5.**  $^{13}\text{C}$  NMR of *m*CN-OTP.

[ Mass Spectrum ]  
 Data : EI-A439 Date : 21-Jan-2021 12:08  
 RT : 1.98 min Scan# : (51,91)  
 Elements : C 100/0, H 100/0, N 10/0  
 Mass Tolerance : 20ppm, 5mmu if m/z < 250, 20mmu if m/z > 1000  
 Unsaturation (U.S.) : -0.5 - 50.0

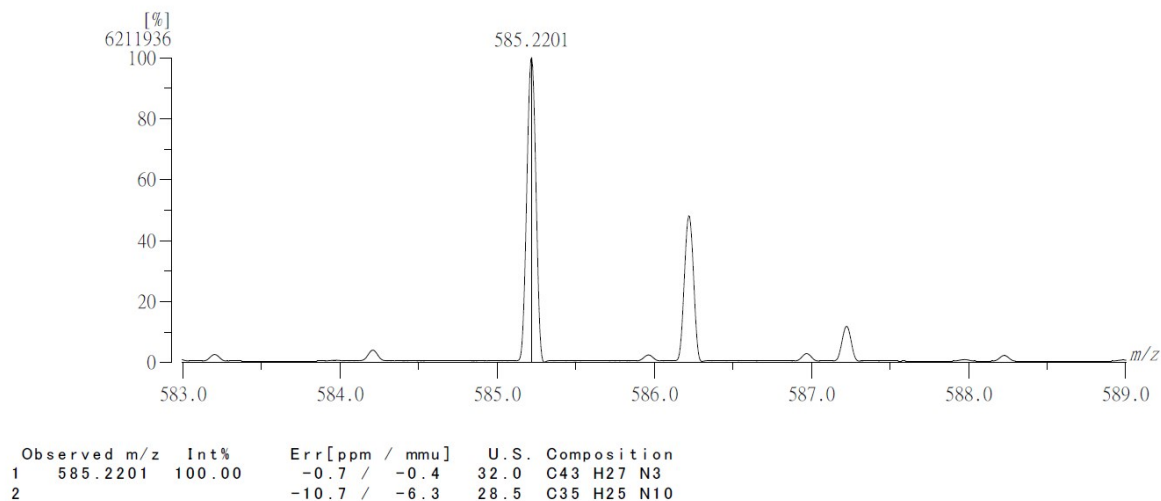

**Figure S6.** HRMS of *m*CN-OTP.

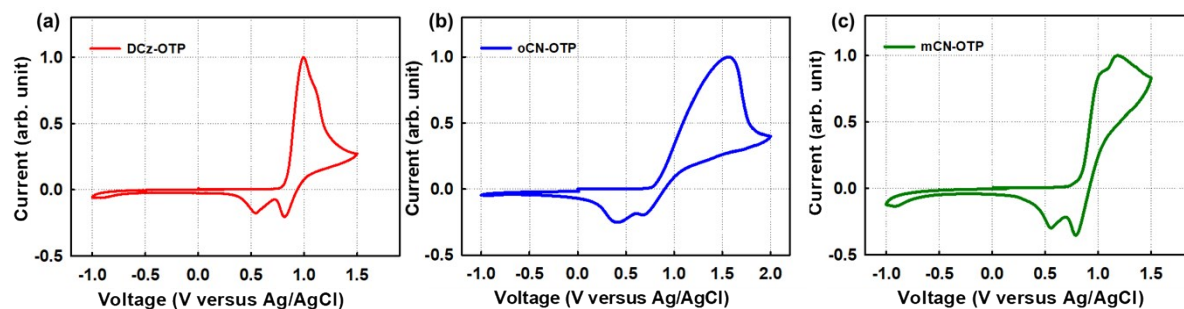

**Figure S7.** Cyclic Voltammetry (CV) cure of DCz-OTP, *o*CN-OTP and *m*CN-OTP.

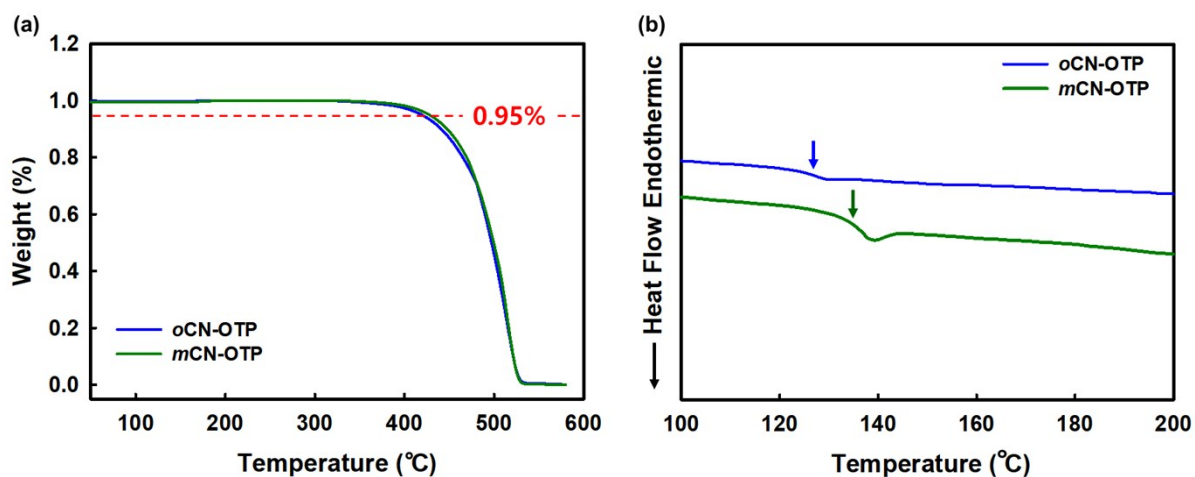

**Figure S8.** TGA and DSC graphs of DCz-OTP, *o*CN-OTP and *m*CN-OTP.

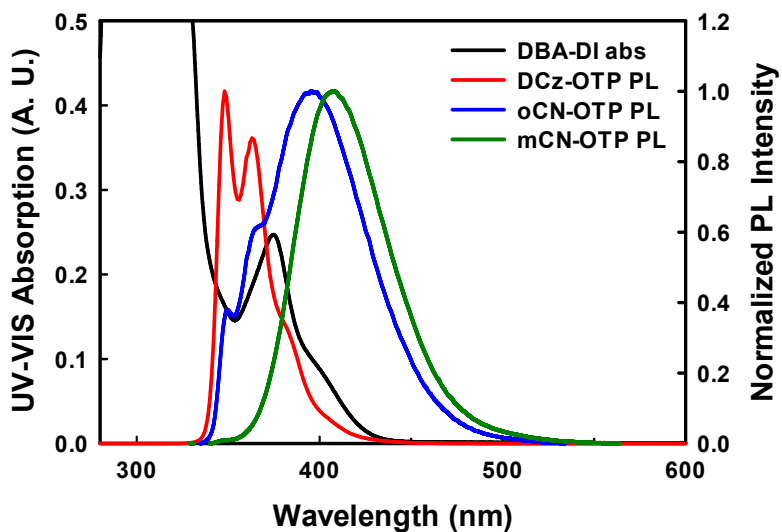

**Figure S9.** Spectral overlap between PL emission of three host and absorption of DBA-DI TADF dopant.

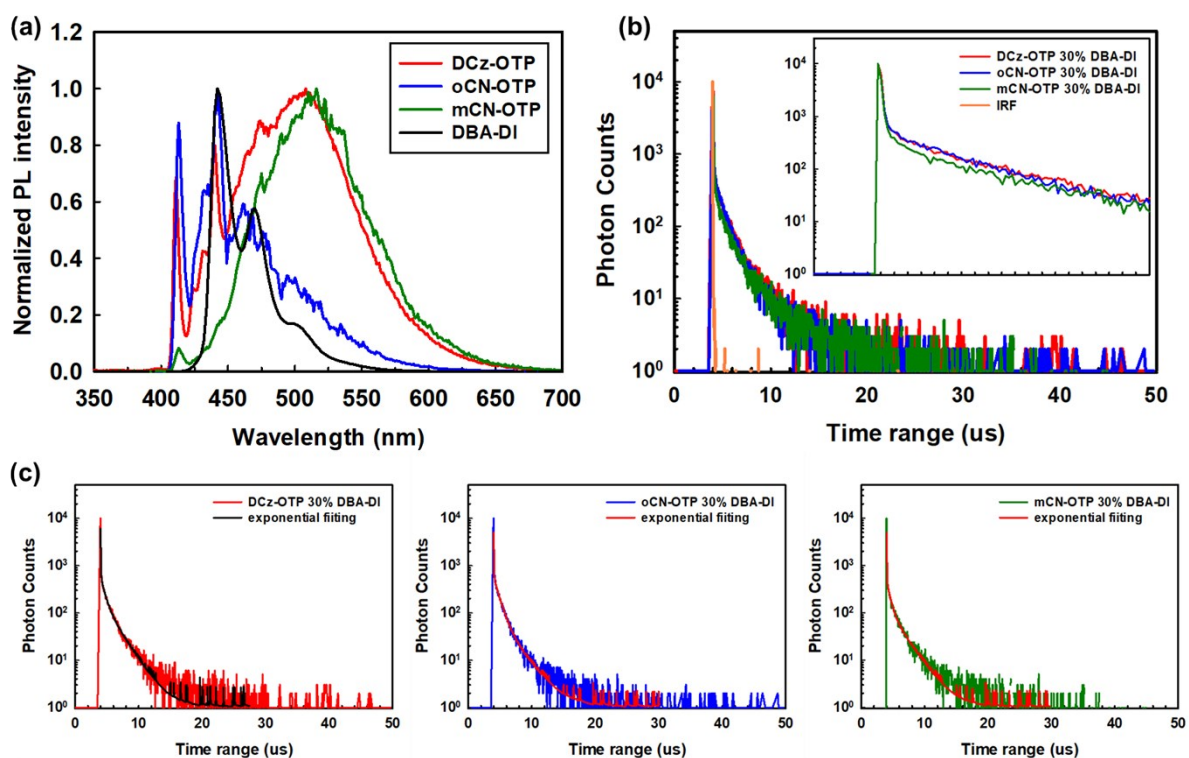

**Figure S10.** (a) Comparison of phosphorescence spectra of DCz-OTP, *o*CN-OTP, *m*CN-OTP and DBA-DI in toluene and (b) film TRPL of 30% of DBA-DI in DCz-OTP, *o*CN-OTP and *m*CN-OTP. (c) exponential fitting curve for determining decay time.

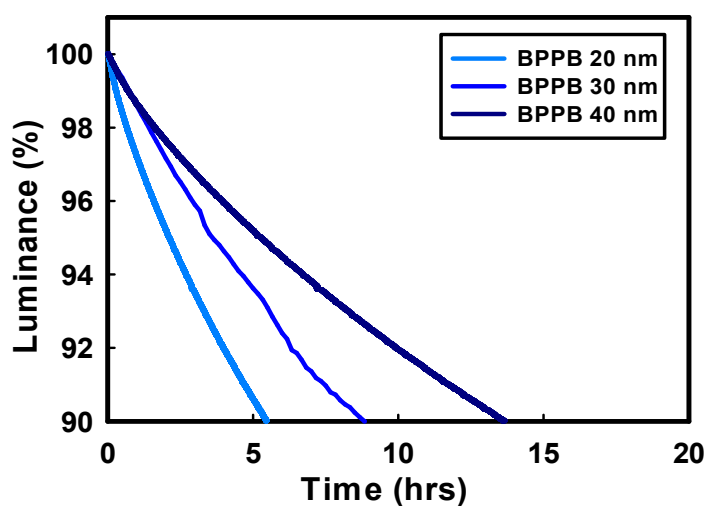

**Figure S11.** Device lifetimes of *m*CN-OTP host device depending on the thickness of BPPB at initial luminance of 1,000 cd/m<sup>2</sup>.



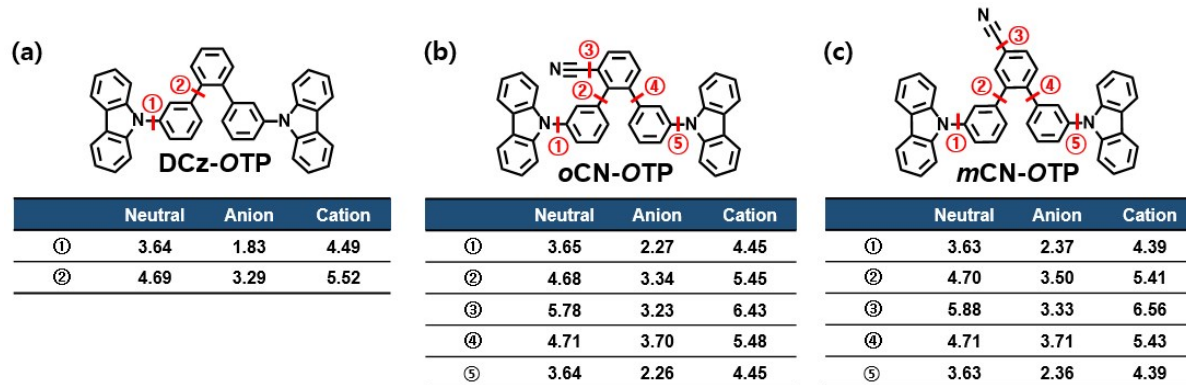

**Figure S12.** Calculation of Bond dissociation energies of host materials in neutral, anion, and cation states.
